# Supplementary material for: Changes in Physical Activity, Sitting and Sleep across the COVID-19 National Lockdown Period in Scotland
Source: PubMed Central journal article supplement (PMC7765067; doi:10.3390/ijerph17249362), 2020-12-14
Supplement: ijerph-17-09362-s001.pdf [file ijerph-17-09362-s001.pdf]

## Supplementary tables

**Table S1.** Sleep recommendations' categorization.

|                 | <b>Insufficient</b> | <b>Appropriate (Low)</b> | <b>Recommended</b> | <b>Appropriate (High)</b> | <b>Too Much</b> |
|-----------------|---------------------|--------------------------|--------------------|---------------------------|-----------------|
| 18–25 year olds | < 6 h               | 6 h                      | 7 to 9 h           | 10 to 11 h                | ≥ 12 h          |
| 26–64 year olds | < 6 h               | 6 h                      | 7 to 9 h           | 10 h                      | ≥ 11 h          |
| +65 year olds   | < 5 h               | 5 to 6 h                 | 7 to 8 h           | 9 h                       | ≥ 10 h          |

**Table S2.** Differences between included and drop out participants.

|                       | <b>Included</b> |                          |           | <b>Drop Out <sup>a</sup></b> |                          |           | <b>p</b> |
|-----------------------|-----------------|--------------------------|-----------|------------------------------|--------------------------|-----------|----------|
|                       | <b>N</b>        | <b>Mean <sup>b</sup></b> | <b>SD</b> | <b>N</b>                     | <b>Mean <sup>b</sup></b> | <b>SD</b> |          |
| <b>T1-T2</b>          |                 |                          |           |                              |                          |           |          |
| Sitting per day (min) | 2297            | 396.80                   | 189.12    | 255                          | 397.91                   | 178.12    | 0.929    |
| MVPA per week (min)   | 2358            | 358.17                   | 522.30    | 168                          | 518.35                   | 679.34    | <0.001   |
| Walk per week (min)   | 2363            | 476.10                   | 523.47    | 332                          | 496.36                   | 507.06    | 0.508    |
| Sleep per night (h)   | 2458            | 6.60                     | 1.22      | 758                          | 6.58                     | 1.26      | 0.802    |
| <b>T2-T3</b>          |                 |                          |           |                              |                          |           |          |
| Sitting per day (min) | 1495            | 420.44                   | 207.48    | 845                          | 439.77                   | 216.28    | 0.033    |
| MVPA per week (min)   | 1548            | 406.98                   | 574.96    | 873                          | 461.78                   | 682.77    | 0.045    |
| Walk per week (min)   | 1557            | 427.93                   | 404.56    | 855                          | 404.39                   | 452.01    | 0.190    |
| Sleep per night (h)   | 1608            | 6.88                     | 1.51      | 865                          | 6.87                     | 1.62      | 0.868    |

<sup>a</sup> Drop out from T1 to T2 or T2 to T3; <sup>b</sup> Mean indicates mean at T1 (for T1-T2) and mean at T2 (for T2-T3).

**Table S3.** Number of participants in each movement behavior category at T1 (rows) and T2 (columns).

| <b>MVPA (min/week)</b> |              |                   |             |                    |          |       |                       |
|------------------------|--------------|-------------------|-------------|--------------------|----------|-------|-----------------------|
|                        | <30          | 30 to <60         | 60 to <150  | 150 to <300        | 300+     | Total | Positive changers (%) |
| <30                    | 265          | 14                | 72          | 61                 | 129      | 541   | 51.02                 |
| 30 to <60              | 9            | 8                 | 11          | 12                 | 5        | 45    | 62.22                 |
| 60 to <150             | 81           | 10                | 106         | 82                 | 117      | 396   | 49.74                 |
| 150 to <300            | 64           | 7                 | 60          | 127                | 193      | 451   | 42.79                 |
| +300                   | 94           | 16                | 95          | 120                | 600      | 925   | NA                    |
| Total                  | 513          | 55                | 344         | 402                | 1044     | 2358  |                       |
| <b>Walk (min/week)</b> |              |                   |             |                    |          |       |                       |
|                        | <30          | 30 to <60         | 60 to <150  | 150 to <300        | 300+     | Total | Positive changers (%) |
| <30                    | 45           | 7                 | 27          | 23                 | 52       | 154   | 70.78                 |
| 30 to <60              | 10           | 5                 | 21          | 16                 | 16       | 68    | 77.94                 |
| 60 to <150             | 36           | 9                 | 78          | 60                 | 156      | 339   | 63.72                 |
| 150 to <300            | 28           | 16                | 79          | 122                | 187      | 432   | 43.3                  |
| 300+                   | 106          | 27                | 162         | 177                | 898      | 1370  | NA                    |
| Total                  | 225          | 64                | 367         | 398                | 1309     | 2363  |                       |
| <b>Sitting (h/day)</b> |              |                   |             |                    |          |       |                       |
|                        | <4           | 4 to <6           | 6 to <8     | 8+                 |          | Total | Positive changers (%) |
| <4                     | 188          | 120               | 61          | 36                 |          | 405   | NA                    |
| 4 to <6                | 86           | 232               | 118         | 120                |          | 556   | 15.47                 |
| 6 to <8                | 46           | 96                | 160         | 184                |          | 486   | 29.22                 |
| 8+                     | 35           | 76                | 101         | 638                |          | 850   | 24.94                 |
| Total                  | 355          | 524               | 440         | 978                |          | 2297  |                       |
| <b>Sleep (h/night)</b> |              |                   |             |                    |          |       |                       |
|                        | Insufficient | Appropriate (low) | Recommended | Appropriate (high) | Too much | Total | Positive changers (%) |
| Insufficient           | 157          | 59                | 122         | 3                  | 3        | 344   | 53.49                 |
| Appropriate (low)      | 128          | 251               | 385         | 17                 | 4        | 785   | 49.04                 |
| Recommended            | 122          | 199               | 924         | 48                 | 6        | 1299  | NA                    |
| Appropriate (high)     | 0            | 1                 | 6           | 9                  | 3        | 19    | 31.58                 |
| Too much               | 0            | 0                 | 2           | 1                  | 1        | 4     | 50.00                 |
| Total                  | 407          | 509               | 1439        | 78                 | 17       | 2451  |                       |

Footnote: a positive change is illustrated in green, a negative change is illustrated in orange and no change is illustrated in yellow.

**Table S4.** Number of participants in each movement behavior category at T2 (rows) and T3 (columns).

| MVPA (min/week)    |              |                   |             |                    |          |       | Positive changers (%) |
|--------------------|--------------|-------------------|-------------|--------------------|----------|-------|-----------------------|
|                    | <30          | 30 to <60         | 60 to <150  | 150 to <300        | 300+     | Total |                       |
| <30                | 198          | 12                | 48          | 25                 | 66       | 349   | 43.27                 |
| 30 to <60          | 13           | 1                 | 12          | 6                  | 7        | 39    | 64.10                 |
| 60 to <150         | 50           | 8                 | 49          | 41                 | 68       | 216   | 50.46                 |
| 150 to <300        | 36           | 6                 | 40          | 81                 | 104      | 267   | 38.95                 |
| 300+               | 58           | 3                 | 44          | 87                 | 485      | 677   | NA                    |
| Total              | 355          | 30                | 193         | 240                | 730      | 1548  |                       |
| Walk (min/week)    |              |                   |             |                    |          |       | Positive changers (%) |
|                    | <30          | 30 to <60         | 60 to <150  | 150 to <300        | 300+     | Total |                       |
| <30                | 37           | 8                 | 35          | 21                 | 41       | 142   | 73.94                 |
| 30 to <60          | 5            | 1                 | 13          | 7                  | 10       | 36    | 83.33                 |
| 60 to <150         | 26           | 25                | 58          | 61                 | 59       | 229   | 52.40                 |
| 150 to <300        | 12           | 15                | 38          | 81                 | 114      | 260   | 43.85                 |
| 300+               | 31           | 41                | 37          | 120                | 661      | 890   | NA                    |
| Total              | 111          | 90                | 181         | 290                | 885      | 1557  |                       |
| Sitting (h/day)    |              |                   |             |                    |          |       | Positive changers (%) |
|                    | <4           | 4 to <6           | 6 to <8     | 8+                 |          | Total |                       |
| <4                 | 126          | 74                | 22          | 10                 |          | 232   | NA                    |
| 4 to <6            | 104          | 151               | 67          | 49                 |          | 371   | 28.03                 |
| 6 to <8            | 44           | 85                | 82          | 65                 |          | 276   | 46.74                 |
| 8+                 | 40           | 52                | 120         | 404                |          | 616   | 34.42                 |
| Total              | 314          | 362               | 291         | 528                |          | 1495  |                       |
| Sleep              |              |                   |             |                    |          |       | Positive changers (%) |
|                    | Insufficient | Appropriate (low) | Recommended | Appropriate (high) | Too much |       |                       |
| Insufficient       | 131          | 93                | 27          | 0                  | 0        | 251   | 47.81                 |
| Appropriate (low)  | 44           | 186               | 111         | 2                  | 0        | 343   | 32.36                 |
| Recommended        | 53           | 178               | 700         | 12                 | 2        | 945   | NA                    |
| Appropriate (high) | 1            | 5                 | 35          | 13                 | 1        | 55    | 63.64                 |
| Too much           | 2            | 1                 | 4           | 2                  | 0        | 9     | 77.78                 |
| Total              | 231          | 462               | 877         | 29                 | 3        | 1603  |                       |

Footnote: a positive change is illustrated in green, a negative change is illustrated in orange and no change is illustrated in yellow.
